# Supplementary material for: What controls the unusual melting profiles of small AuNPs/DNA complexes
Source: Royal Society of Chemistry journal article supplement (doi:10.1039/c9cp01162e), 2019-01-01
Supplement: c9cp01162e1.pdf [file c9cp01162e1.pdf]

**Supporting Information:**

**What controls the unusual melting profiles of small AuNPs/DNA complexes**

**Elia Grueso\*, Rosa M. Giráldez-Pérez, Pilar Perez-Tejeda, Emilio Roldán and R.**

**Prado-Gotor**

Department of Physical Chemistry, University of Sevilla, C/ Profesor García González  
s/n 41012 Sevilla, Spain. Tel: +34-954557175 (ext. 215); Fax: +34-954557174; E-mail  
address: [elia@us.es](mailto:elia@us.es)

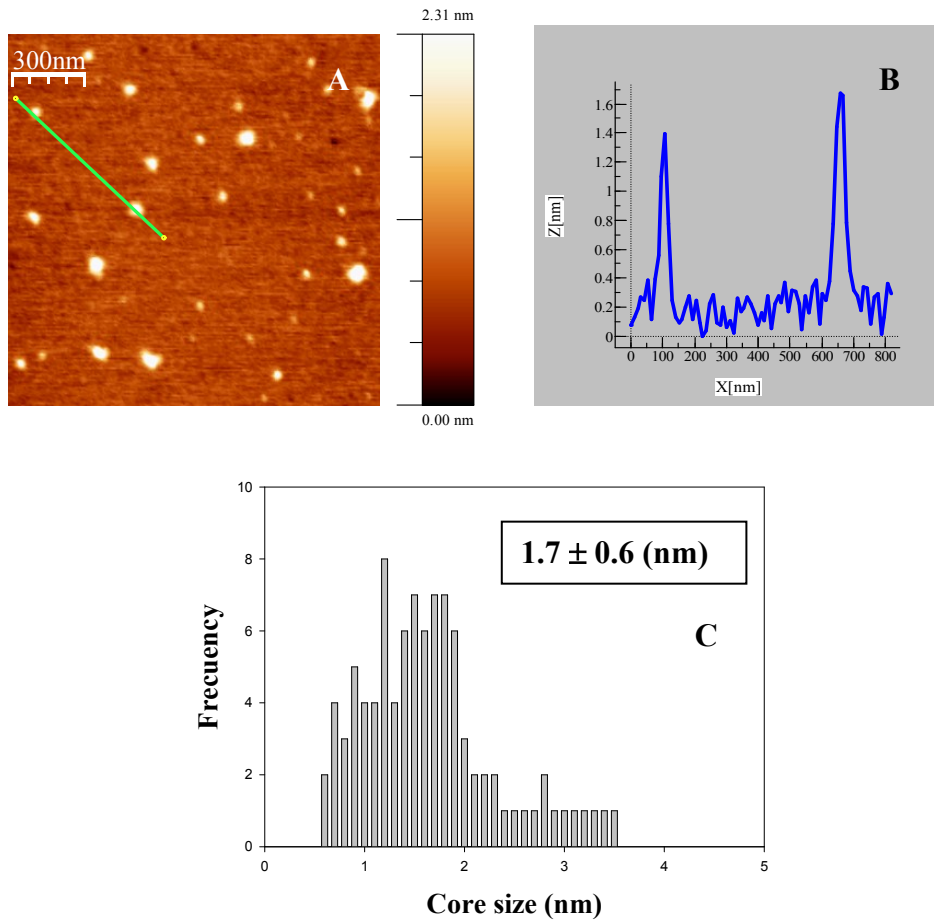

**Figure S1.** AFM characterization of tiopronin gold nanoparticles in water solution. (A) AFM image; (B) cross sectional analysis along the selected lines for image A, and (C) histogram of size distribution of AuNPs.

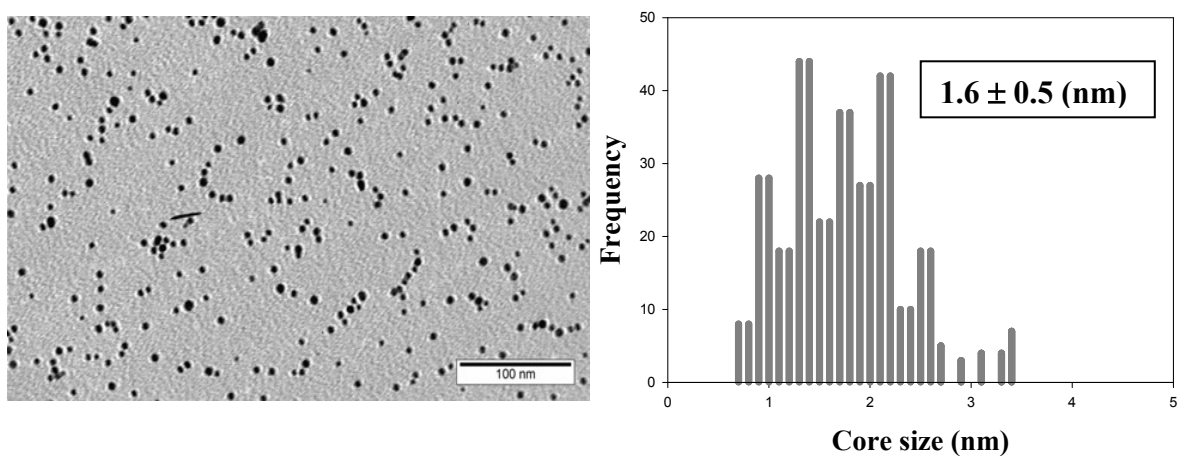

**Figure S2.** TEM image and histogram of core-size distribution of tiopronin-gold nanoparticles in water solution

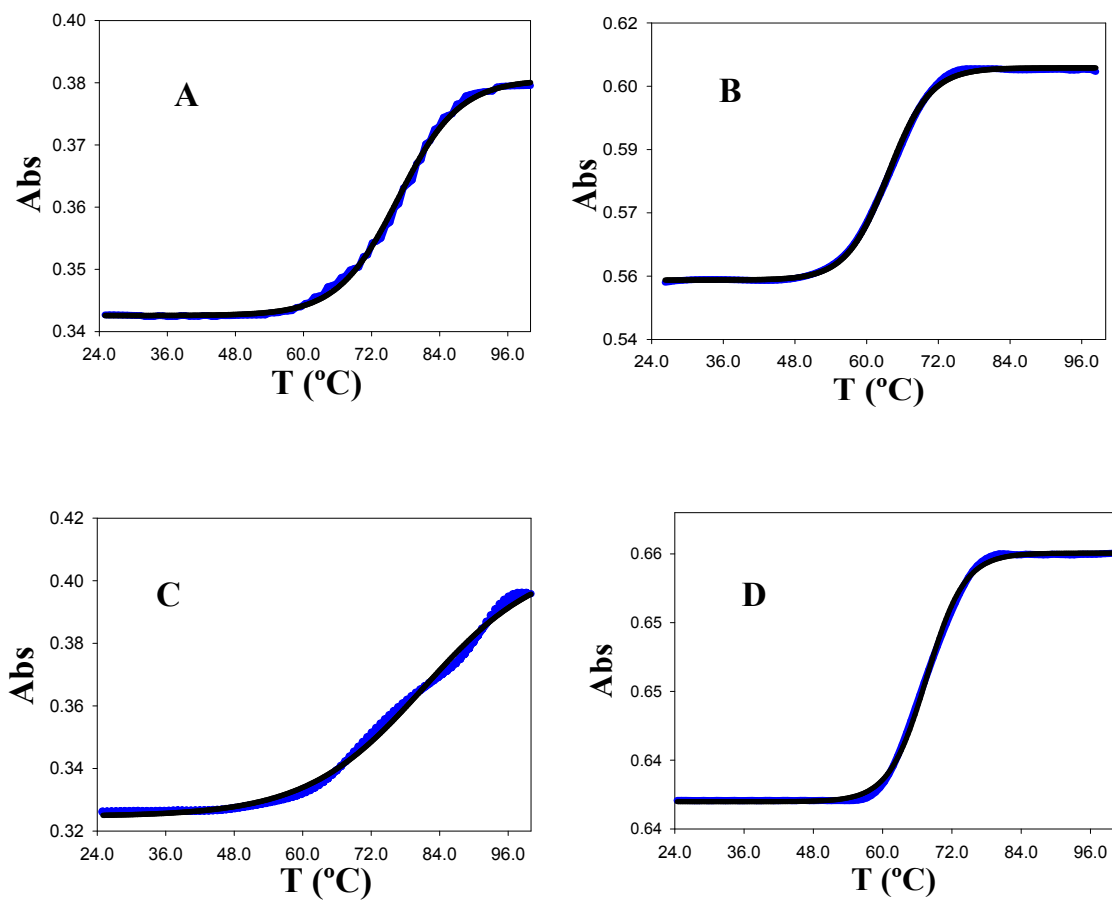

**Figure S3.** Examples of melting data fit to a two-state transition according to Boltzmann sigmoid analysis, experimental data obtained from Figure 1. The black lines represent the data fit to equation (2) from the text. (A)  $C_{\text{DNA}} = 50 \mu\text{M}$ ,  $C_{\text{AuNPs}} = 0 \text{ M}$ , in water; (B)  $C_{\text{DNA}} = 50 \mu\text{M}$ ,  $R = 0.080$ , in water; (C)  $C_{\text{DNA}} = 50 \mu\text{M}$ ,  $C_{\text{AuNPs}} = 0 \text{ M}$ ,  $C_{\text{NaCl}} = 0.015 \text{ M}$ ; (D)  $C_{\text{DNA}} = 50 \mu\text{M}$ ,  $R = 0.007$ ,  $C_{\text{NaCl}} = 0.015 \text{ M}$ .

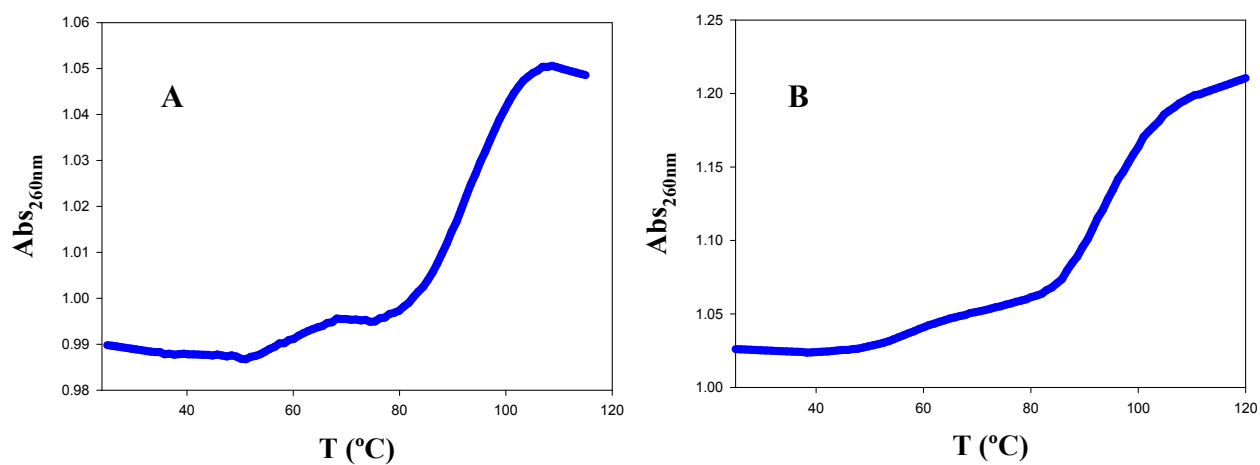

**Figure S4.** Melting profile of gold nanoparticles at  $C_{\text{AuNPs}} = 8 \times 10^{-6}$  M in the absence of the biopolymer as control experiments: (A) in water and (B) in  $C_{\text{NaCl}} = 0.015$  M solution.

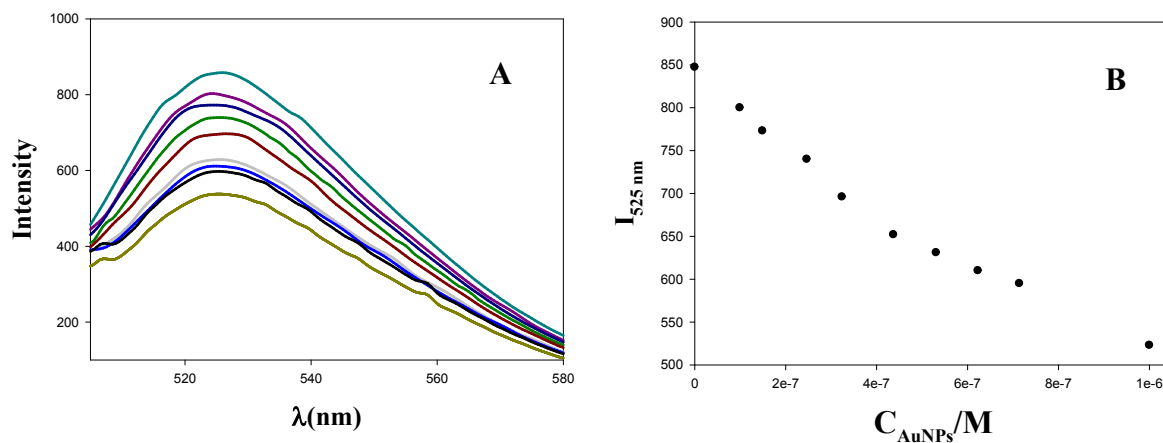

**Figure S5.** (A) Emission spectra of the SYBR Green I/DNA complex in the presence of different AuNPs concentrations ( $\lambda_{exc} = 484$  nm;  $\lambda_{em} = 525$  nm). Curves correspond to 0 (●),  $9.93 \times 10^{-8}$  (●),  $1.49 \times 10^{-7}$  (●),  $2.47 \times 10^{-7}$  (●),  $3.24 \times 10^{-7}$  (●),  $4.37 \times 10^{-7}$  (●),  $6.23 \times 10^{-7}$  (●),  $7.14 \times 10^{-7}$  M (●) and  $1.00 \times 10^{-6}$  (●) of AuNPs.  $C_{DNA} = 2.5 \times 10^{-7}$  M;  $C_{SG} = 1.0 \times 10^{-6}$  M. (B) Variation of the relative SYBR Green I/ds-DNA fluorescence intensity with  $C_{AuNPs}$  at 525 nm for Figure S5-A.

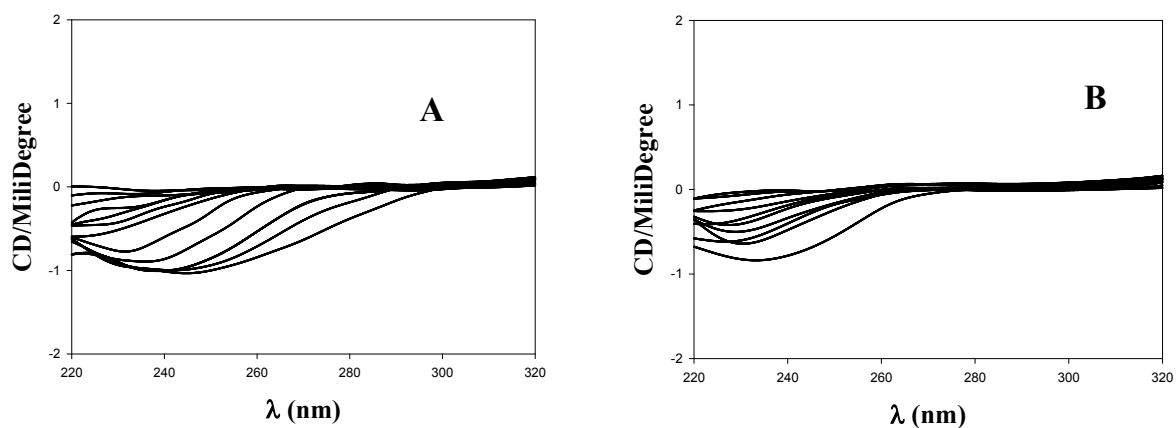

**Figure S6.** CD spectra of small AuNPs at different  $C_{\text{AuNPs}}$  concentrations. (A) in water,  $C_{\text{AuNPs}}$  for the spectra from a to l is 0.05, 0.15, 0.24, 0.29, 0.48, 0.58, 0.70, 1.00, 1.50, 2.00, 3.00 and 4.00  $\mu\text{M}$ ; (B) in salt,  $C_{\text{NaCl}} = 0.015 \text{ M}$ ,  $C_{\text{AuNPs}}$  for the spectra from a to k is 0.05, 0.15, 0.29, 0.48, 0.58, 0.70, 1.00, 1.50, 2.00, 3.00 and 4.00  $\mu\text{M}$ .

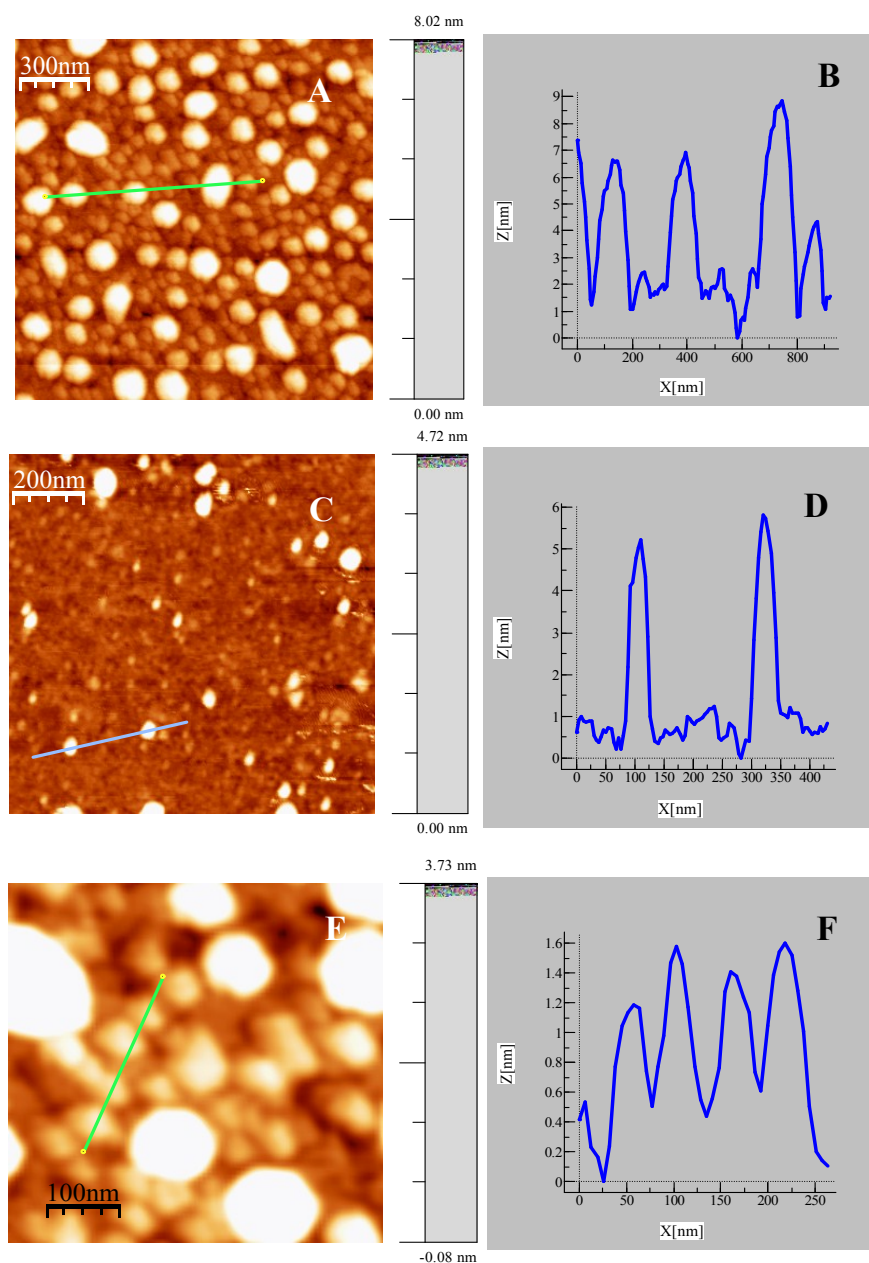

**Figure S7.** Analysis of AFM topographic images in Fig. 8 obtained at  $C_{\text{DNA}} = 3.0 \times 10^{-7}$  M,  $C_{\text{AuNPs}} = 2.0 \times 10^{-6}$  M and  $C_{\text{NaCl}} = 0.015$  M,  $T = 25.0$  °C. (A) AuNPs/ss-DNA system showing the formation of aggregate compact structures; (C) AuNPs/ds-DNA system highlighting the formation of compact structures; (E) AuNPs/ss-DNA system showing multiple interconnections among the aggregates mediated by small AuNPs. Figures B, D, and F correspond to cross sectional analysis of the heights along the selected line for images A, C, and E, respectively.

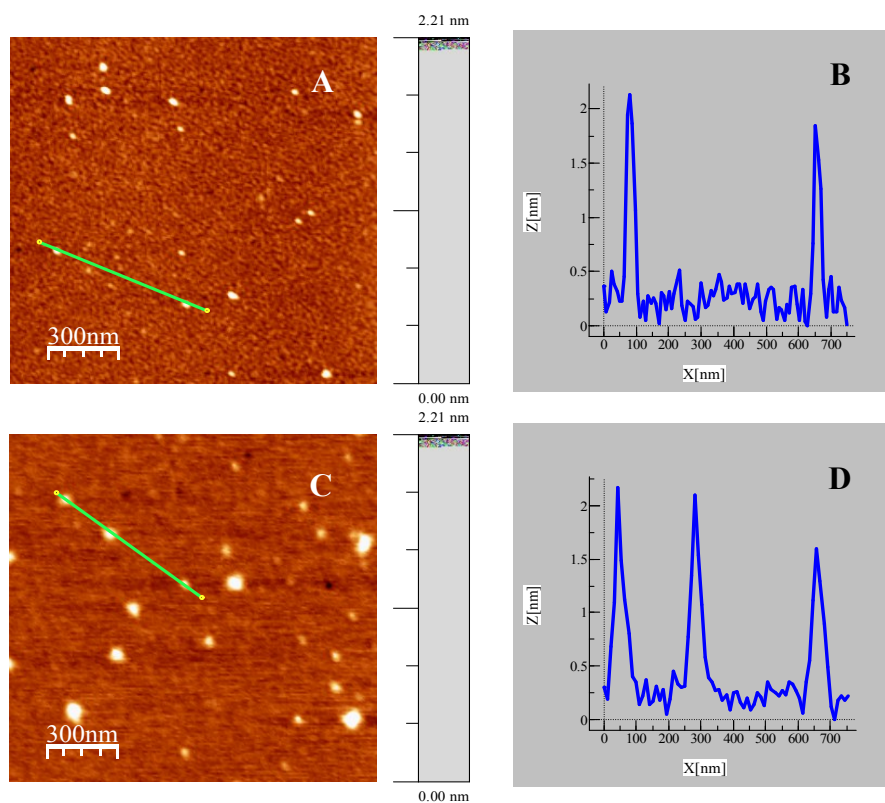

**Figure S8.** AFM topographic images of AuNPs at different NaCl concentration. (A)  $C_{\text{AuNPs}} = 1 \times 10^{-6} \text{ M}$ ;  $C_{\text{NaCl}} = 0.006 \text{ M}$ ; (C)  $C_{\text{AuNPs}} = 1 \times 10^{-6} \text{ M}$ ;  $C_{\text{NaCl}} = 0.015 \text{ M}$ . Figures B and D correspond to cross sectional analysis along the selected lines for images A and C, respectively.



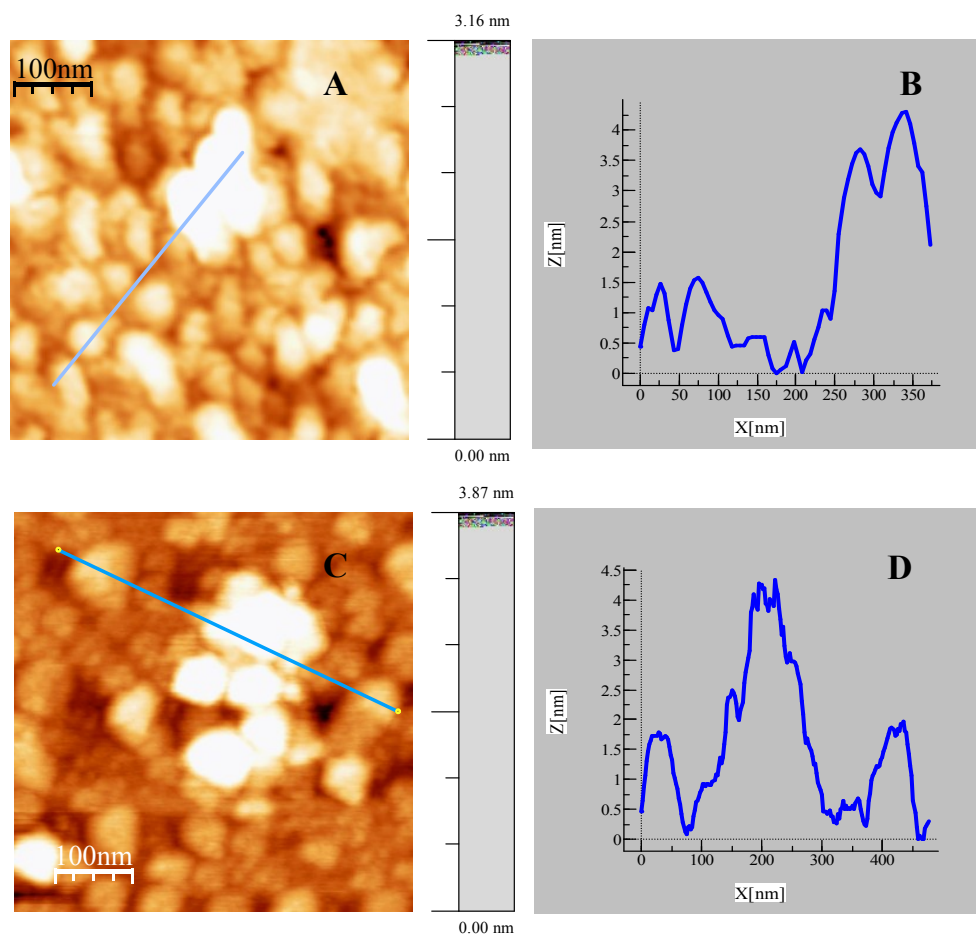

**Fig S9.** Analysis of AFM topographic images described in Fig. 9 showing multiple interconnection among the aggregates mediated by small AuNP. The images were obtained at  $C_{\text{DNA}} = 3.0 \times 10^{-7}$  M,  $C_{\text{AuNPs}} = 5.0 \times 10^{-8}$  M and  $C_{\text{NaCl}} = 0.015$  M,  $T = 65.0$  °C. (A) AuNPs/ss-DNA; (C) AuNPs/ds-DNA. Figures B and D correspond to cross sectional analysis of the heights along the selected line for images A, and C, respectively.

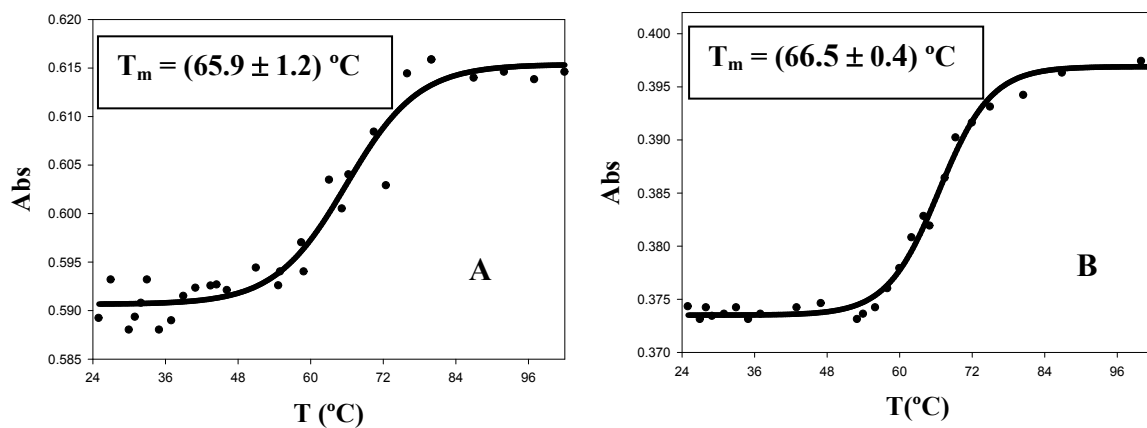

**Figure S10.** Absorbance versus temperature of the AuNPs/DNA nanocomplexes formed in at the low R ratio and heating the sample to 100 °C of temperature. (A) in water,  $R = 0.080$  and (B) in salt,  $C_{\text{NaCl}} = 0.015 \text{ M}$ ,  $R = 0.003 \text{ M}$ . The black lines represent the data fit to equation (2) from the text. The experiments were done following the absorbance of the complexes at 260 nm after complex formation, and cooling the sample back down to room temperature.

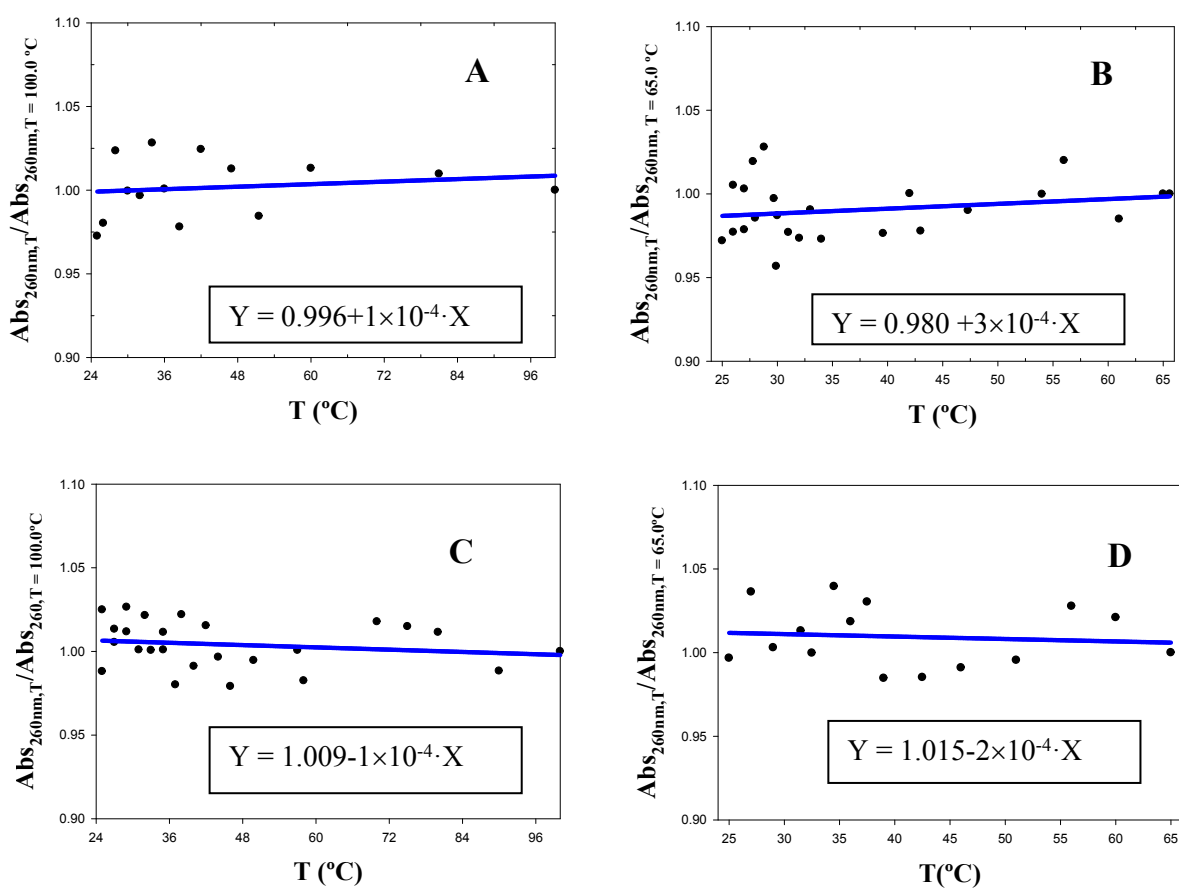

**Figure S11.** Absorbance relative versus temperature of the AuNPs/DNA nanocomplexes formed at the high R ratio and 100.0 °C or 65.0 °C of temperature. (A) in water,  $R = 0.16$ ,  $T = 100.0\text{ }^\circ\text{C}$ ; (B) in water,  $R = 0.16$ ,  $T = 65.0\text{ }^\circ\text{C}$ ; (C)  $C_{\text{NaCl}} = 0.015\text{ M}$ ,  $R = 0.16$ ,  $T = 100.0\text{ }^\circ\text{C}$ , and (D)  $C_{\text{NaCl}} = 0.015\text{ M}$ ,  $R = 0.16$ ,  $T = 65.0\text{ }^\circ\text{C}$ . The blue lines represent the data fit to linear regression. The experiments were done following the absorbance of the complexes at 260 nm after complex formation, and cooling the sample back down to room temperature (see section 2.2.5 for more details).

**Table 1. T<sub>m</sub> values of ds-DNA at different AuNPs and NaCl concentrations obtained from Boltzmann sigmoid analysis (see equation 2 from the text).**

| <b>C<sub>AuNPs</sub>/μM</b> | <b>C<sub>NaCl</sub> = 0.000 /M</b> |                 |                 | <b>C<sub>NaCl</sub> = 0.015/ M</b> |                 |                 |
|-----------------------------|------------------------------------|-----------------|-----------------|------------------------------------|-----------------|-----------------|
|                             | <b>Sample 1</b>                    | <b>Sample 2</b> | <b>Sample 3</b> | <b>Sample 1</b>                    | <b>Sample 2</b> | <b>Sample 3</b> |
| <b>0.000</b>                | 76.8 ± 1.0 °C                      | 77.4 ± 0.8 °C   | 76.6 ± 0.8 °C   | 81.3 ± 0.4 °C                      | 79.4 ± 0.2 °C   | 79.8 ± 1.1 °C   |
| <b>0.150</b>                | 75.8 ± 1.0 °C                      | 75.4 ± 0.8 °C   | 75.7 ± 0.4 °C   | 72.0 ± 1.0 °C                      | 71.1 ± 0.5 °C   | 71.8 ± 0.4 °C   |
| <b>0.350</b>                | 75.6 ± 0.2 °C                      | 75.6 ± 0.8 °C   | 75.2 ± 0.3 °C   | 67.6 ± 0.5 °C                      | 68.0 ± 0.2 °C   | 67.9 ± 0.4 °C   |
| <b>0.500</b>                | 74.6 ± 0.2 °C                      | 75.2 ± 0.2 °C   | 75.0 ± 0.3 °C   | 67.0 ± 0.2 °C                      | 67.2 ± 0.4 °C   | 67.4 ± 0.4 °C   |
| <b>1.000</b>                | 71.9 ± 1.3 °C                      | 72.1 ± 0.3 °C   | 70.7 ± 0.3 °C   | 65.1 ± 1.2 °C                      | 64.8 ± 0.5 °C   | 64.9 ± 0.6 °C   |
| <b>4.000</b>                | 63.6 ± 0.4 °C                      | 64.2 ± 0.4 °C   | 64.5 ± 0.3 °C   | -----                              | -----           | -----           |

**Table S2. Tm mean values and standard deviations calculated from data in Table S1.**

|                             | <b>C<sub>NaCl</sub> = 0.000 /M</b>   | <b>C<sub>NaCl</sub> = 0.015/ M</b>   |
|-----------------------------|--------------------------------------|--------------------------------------|
| <b>C<sub>AuNPs</sub>/μM</b> | <b>T<sub>m</sub>, Mean Value /°C</b> | <b>T<sub>m</sub>, Mean Value /°C</b> |
| <b>0.000</b>                | 76.9 ± 0.3 °C                        | 80.2 ± 0.8 °C                        |
| <b>0.150</b>                | 75.6 ± 0.2 °C                        | 71.4 ± 0.4 °C                        |
| <b>0.350</b>                | 75.3 ± 0.2 °C                        | 67.8 ± 0.2 °C                        |
| <b>0.500</b>                | 74.9 ± 0.3 °C                        | 67.2 ± 0.2 °C                        |
| <b>1.000</b>                | 71.6 ± 0.6 °C                        | 64.9 ± 0.1 °C                        |
| <b>4.000</b>                | 64.1 ± 0.4 °C                        | -----                                |
